# Supplementary material for: Catalytic diastereo- and positionselective oxidative mono-cyclization of 1,5,9-trienes and polyenes
Source: Royal Society of Chemistry journal article supplement (doi:10.1039/b702877f), 2007-01-01
Supplement: b702877f.pdf [file b702877f.pdf]

## **Catalytic Diastereo- and Positionselective Oxidative Mono- Cyclization of 1,5,9-Trienes and Polyenes**

Sabrina Göhler<sup>a</sup> and Christian B. W. Stark<sup>\*a</sup>

### Supporting Information

Analytical Data for compounds 7a, 7c-d, 8, 19, 21, 22, 29, 32 and the corresponding ketols

**6-(tert-Butyl-diphenyl-silanyloxy)-1-[5-(1-hydroxy-1-methyl-ethyl)-2-methyl-tetrahydro-furan-2-yl]-4-methyl-hex-4-en-1-ol (7a)**

IR (KBr):  $\nu_{max}$  3433, 2963, 2931, 2857, 1761, 1719, 1472, 1463, 1428, 1379, 1113, 1064, 823, 741, 703, 614, 506; NMR:  $\delta_H$  1.03 (9 H, s, SiC(CH<sub>3</sub>)<sub>3</sub>), 1.11 (3 H, s, C(2)-CH<sub>3</sub>), 1.15 (3 H, s, C(5)-C(OH)(CH<sub>3</sub>)<sub>2</sub>), 1.23 (3 H, s, C(5)-C(OH)(CH<sub>3</sub>)<sub>2</sub>), 1.44 (3 H, s, CH<sub>2</sub>C(CH<sub>3</sub>)=CH), 1.49 (2 H, m, C(2)-CHOHCH<sub>2</sub>), 1.63 (1 H, m, C(3)-H<sup>a</sup>), 1.88 (3 H, m, C(4)-H<sub>2</sub> and C(3)-H<sup>b</sup>), 2.02 (1 H, C(2)-CH(OH)CH<sub>2</sub>CH<sup>a</sup>), 2.25 (1 H, C(2)-CH(OH)CH<sub>2</sub>CH<sup>b</sup>), 3.36 (1 H, m, C(2)-CHOH), 3.84 (1 H, m, C(5)-H), 4.21 (2 H, d, *J* 6.3, CH<sub>2</sub>OTBDPS), 5.40 (1 H, tq, *J* 6.3 and 1.1, CH<sub>2</sub>C(CH<sub>3</sub>)=CHCH<sub>2</sub>), 7.36 (6 H, m, Ar), 7.67 (4 H, m, Ar);  $\delta_C$  16.4 (CH<sub>2</sub>C(CH<sub>3</sub>)=CHCH<sub>2</sub>), 19.1 (SiC(CH<sub>3</sub>)<sub>3</sub>), 21.0 (C(5)-COH(CH<sub>3</sub>)<sub>2</sub>), 24.8 (C(2)-CH<sub>3</sub>), 26.6 (C(4)), 28.8 (SiC(CH<sub>3</sub>)<sub>3</sub>), 27.3 (C(5)-COH(CH<sub>3</sub>)<sub>2</sub>), 30.1 (C(2)-CH(OH)CH<sub>2</sub>), 35.1 (C(3)), 36.3 (C(2)-CH(OH)CH<sub>2</sub>CH<sub>2</sub>), 61.1 (CH<sub>2</sub>OTBDPS), 71.6 (C(5)-COH(CH<sub>3</sub>)<sub>2</sub>), 77.1 (C(2)-COHCH<sub>2</sub>), 85.2 (C(5)), 85.8 (C(2)), 124.2 (CH<sub>2</sub>C(CH<sub>3</sub>)=CHCH<sub>2</sub>), 127.5 (4 x Ar), 129.5 (2 x Ar), 134.0 (2 x Ar), 135.6 (4 x Ar), 137.1 (CH<sub>2</sub>C(CH<sub>3</sub>)=CHCH<sub>2</sub>); MS (EI) *m/z* 510 ([M]<sup>+</sup>, 1 %), 483 ([M - OH]<sup>+</sup>, 1), 467 (2), 451 ([M - (CH<sub>3</sub>)<sub>2</sub>C(OH)]<sup>+</sup>, 3), 435 (4), 347 (5), 199 ([Ph<sub>2</sub>SiOH]<sup>+</sup>, 89), 143 ([[(CH<sub>3</sub>)<sub>2</sub>(OH)C-THF-CH<sub>3</sub>]<sup>+</sup>, 59), 135 (29), 71 ([THF - H]<sup>+</sup>, 57), 43 ([C<sub>3</sub>H<sub>7</sub>]<sup>+</sup>, 100); HRMS (EI) *m/z* 451.2669 ([M]<sup>+</sup>, C<sub>28</sub>H<sub>39</sub>O<sub>3</sub>Si requires 451.2674).

**6-(tert-Butyl-diphenyl-silanyloxy)-1-[5-(1-hydroxy-1-methyl-ethyl)-2-methyl-tetrahydro-furan-2-yl]-4-methyl-hex-4-en-1-one (10a)**

IR (KBr):  $\nu_{max}$  3442, 2975, 2933, 1717, 1451, 1381, 1274, 1114, 1071, 1026, 952, 714; NMR:  $\delta_H$  1.03 (9 H, s, SiC(CH<sub>3</sub>)<sub>3</sub>), 1.09 (3 H, s, C(2)-CH<sub>3</sub>), 1.29 (3 H, s, Me), 1.40 (3 H, s, Me), 1.42 (3 H, s, Me), 1.77 (3 H, m, C(4)-H<sub>2</sub> and C(3)-H<sup>a</sup>), 2.21 (3 H, m, C(3)-H<sup>b</sup>, C(2)-C(=O)CH<sub>2</sub>), 2.61 (2 H, C(2)-C(=O)CH<sub>2</sub>CH<sub>2</sub>), 3.15 (2 H, br s, OH), 3.90 (1 H, m, C(5)-H), 4.20 (2 H, dd, *J* 6.2 and 0.6, CH<sub>2</sub>OTBDPS), 5.35 (1 H, tq, *J* 7.0 and 1.2, CH<sub>2</sub>C(CH<sub>3</sub>)=CHCH<sub>2</sub>), 7.36 (6 H, m, Ar), 7.66 (4 H, m, Ar);  $\delta_C$  16.5 (CH<sub>2</sub>C(CH<sub>3</sub>)=CHCH<sub>2</sub>), 19.1 (SiC(CH<sub>3</sub>)<sub>3</sub>), 23.9 (C(5)-COH(CH<sub>3</sub>)<sub>2</sub>), 24.8 (C(2)-CH<sub>3</sub>), 25.8 (C(4)), 26.8 (SiC(CH<sub>3</sub>)<sub>3</sub>), 27.7 (C(5)-C(OH)(CH<sub>3</sub>)<sub>2</sub>), 32.9 (C(2)-C(=O)CH<sub>2</sub>), 35.4 (C(2)-CH(OH)CH<sub>2</sub>CH<sub>2</sub>), 36.1 (C(3)), 60.9 (CH<sub>2</sub>OTBDPS), 70.6 (C(5)-C(OH)(CH<sub>3</sub>)<sub>2</sub>), 86.8 (C(5)), 88.2 (C(2)), 124.4 (CH<sub>2</sub>C(CH<sub>3</sub>)=CHCH<sub>2</sub>), 127.5 (4 x Ar), 129.4 (2 x Ar), 133.9 (2 x Ar), 135.5 (4 x Ar), 135.7 (CH<sub>2</sub>C(CH<sub>3</sub>)=CHCH<sub>2</sub>), 212.8 (C(2)-C(=O)CH<sub>2</sub>); MS (EI) *m/z* 508 ([M]<sup>+</sup>, 1 %), 465 ([M - C<sub>3</sub>H<sub>7</sub>]<sup>+</sup>, 3), 451 ([M - 'Bu]<sup>+</sup>, 2), 433 (M - 'Bu - H<sub>2</sub>O)<sup>+</sup>, 3), 241 (43), 235 ([M - Ph<sub>2</sub>SiO - H<sub>2</sub>O]<sup>+</sup>, 30), 199 ([[(CH<sub>3</sub>)<sub>2</sub>(OH)C-THF(CH<sub>3</sub>)-C(=O)CH<sub>2</sub>CH<sub>2</sub>]<sup>+</sup>, 59), 163 (45), 143 ([[(CH<sub>3</sub>)<sub>2</sub>(OH)C-THF(CH<sub>3</sub>)]<sup>+</sup>, 100); HRMS (EI) *m/z* 451.2312 ([M - C<sub>4</sub>H<sub>9</sub>]<sup>+</sup>, C<sub>27</sub>H<sub>35</sub>O<sub>4</sub>Si requires 451.2305).

**4-Nitro-benzoic acid 6-hydroxy-6-[5-(1-hydroxy-1-methyl-ethyl) - 2 - methyl-tetrahydro-furan - 2 - yl]- 3 -methyl-hex-2 -enyl ester (7c)**

IR (KBr):  $\nu_{max}$  3427, 2972, 1723, 1608, 1529, 1459, 1348, 1274, 721; NMR:  $\delta_H$  1.07 (3 H, s, C(2)-CH<sub>3</sub>), 1.12 (3 H, s, C(5)-C(OH)(CH<sub>3</sub>)<sub>2</sub>), 1.19 (3 H, s, C(5)-C(OH)(CH<sub>3</sub>)<sub>2</sub>), 1.51 (2 H, m, C(2)-CH(OH)CH<sub>2</sub>), 1.60 (1 H, m, C(3)-H<sup>a</sup>), 1.74 (3 H, s, CH<sub>2</sub>C(CH<sub>3</sub>)=CH), 1.85 (3 H, m, C(4)-H<sub>2</sub> and C(3)-H<sup>b</sup>), 2.09 (1 H, m, C(2)-CH(OH)CH<sub>2</sub>CH<sup>a</sup>), 2.35 (1 H, m, C(2)-CH(OH)CH<sub>2</sub>CH<sup>b</sup>), 3.34 (1 H, m, C(2)-CHOH), 3.81 (1 H, m, C(5)-H), 4.85 (2 H, d, *J* 7.0, CH<sub>2</sub>OBzNO<sub>2</sub>), 5.46 (1 H, m, CH<sub>2</sub>C(CH<sub>3</sub>)=CHCH<sub>2</sub>), 8.17 (2 H, m, Ar), 8.21 (2 H, m, Ar);  $\delta_C$  16.7 (CH<sub>2</sub>C(CH<sub>3</sub>)=CHCH<sub>2</sub>), 21.1 (C(5)-COH(CH<sub>3</sub>)<sub>2</sub>), 25.0 (C(2)-CH<sub>3</sub>), 26.7 (C(4)), 27.4 (C(5)-C(OH)(CH<sub>3</sub>)<sub>2</sub>), 30.1 (C(2)-CH(OH)CH<sub>2</sub>), 35.3 (C(3)), 36.5 (C(2)-CH(OH)CH<sub>2</sub>CH<sub>2</sub>), 62.8 (CH<sub>2</sub>OBzNO<sub>2</sub>), 71.6 (C(5)-C(OH)(CH<sub>3</sub>)<sub>2</sub>), 77.4 (C(2)-C(OH)CH<sub>2</sub>), 85.2 (C(5)), 85.8 (C(2)), 117.9 (CH<sub>2</sub>C(CH<sub>3</sub>)=CHCH<sub>2</sub>), 123.5 (2 x Ar), 130.8 (2 x Ar), 135.9 (Ar), 143.4 (CH<sub>2</sub>C(CH<sub>3</sub>)=CHCH<sub>2</sub>), 150.5 (Ar), 164.8 (OC(=O)Ar); MS (pos. FAB) *m/z* 444 ([M + Na]<sup>+</sup>, 10 %), 322 ([M + H]<sup>+</sup>, 3), 404 ([M - OH]<sup>+</sup>, 2), 255 ([M - O<sub>2</sub>C-Ph-NO<sub>2</sub>]<sup>+</sup>, 11), 275 (1), 251 (2), 239 (2), 233 ([M - (CH<sub>3</sub>)<sub>2</sub>(OH)C-THF-CH<sub>3</sub>]<sup>+</sup>, 1), 143 ([[(CH<sub>3</sub>)<sub>2</sub>(OH)-THF-CH<sub>3</sub>]<sup>+</sup>, 33).

**(E)-6-(tetrahydro-5-(2-hydroxypropan- 2 - yl) - 2 - methyl- furan-2-yl)-3-methyl - 6 - oxohex - 2 - enyl-4-nitrobenzoate (ketol corresponding to compound 7c)**

IR (KBr):  $\nu_{max}$  3434, 2975, 1724, 1608, 1529, 1449, 1348, 1274, 1102, 1015, 874, 785, 721; NMR:  $\delta_H$  1.04 (3 H, s, C(5)-C(OH)(CH<sub>3</sub>)<sub>2</sub>), 1.24 (3 H, s, C(5)-C(OH)(CH<sub>3</sub>)<sub>2</sub>), 1.36 (3 H, s, C(2)-CH<sub>3</sub>), 1.69 (1 H, m, C(4)-H<sup>a</sup>), 1.76 (3 H, s, CH<sub>2</sub>C(CH<sub>3</sub>)=CH), 1.78 (2 H, m, C(4)-H<sup>b</sup> and C(3)-H<sup>a</sup>), 2.20 (1 H, m, C(3)-H<sup>b</sup>), 2.30 (2 H, t, *J* 7.5, C(2)-CH(=O)CH<sub>2</sub>), 2.68 (2 H, dt, *J* 7.5 and 1.6, C(2)-CH(OH)CH<sub>2</sub>CH<sub>2</sub>), 3.02 (1 H, br s, OH), 3.86 (1 H, m, C(5)-H), 4.81 (2 H, d, *J* 7.0, CH<sub>2</sub>OBzNO<sub>2</sub>), 5.42 (1 H, m, CH<sub>2</sub>C(CH<sub>3</sub>)=CHCH<sub>2</sub>), 8.16 (2 H, m, Ar), 8.21 (2 H, m, Ar);  $\delta_C$  16.7 (CH<sub>2</sub>C(CH<sub>3</sub>)=CHCH<sub>2</sub>), 23.8 (C(2)-CH<sub>3</sub>), 24.8 (C(5)-C(OH)(CH<sub>3</sub>)<sub>2</sub>), 25.8 (C(4)), 27.7 (C(5)-C(OH)(CH<sub>3</sub>)<sub>2</sub>), 32.9 (C(2)-C(=O)CH<sub>2</sub>), 35.1 (C(2)-CH(OH)CH<sub>2</sub>CH<sub>2</sub>), 36.0 (C(3)), 62.4 (CH<sub>2</sub>OBzNO<sub>2</sub>), 70.4 (C(5)-COH(CH<sub>3</sub>)<sub>2</sub>), 86.7 (C(5)), 88.2 (C(2)), 118.2 (CH<sub>2</sub>C(CH<sub>3</sub>)=CHCH<sub>2</sub>), 123.4 (2 x Ar), 130.6 (2 x Ar), 135.7 (Ar), 141.9 (CH<sub>2</sub>C(CH<sub>3</sub>)=CHCH<sub>2</sub>), 150.4 (Ar-NO<sub>2</sub>), 164.6 (OC(=O)Ar), 212.5 (C(2)-C(=O)CH<sub>2</sub>); MS (EI) *m/z* 404 ([M - CH<sub>3</sub>]<sup>+</sup>, 1 %), 373 ([M - NO<sub>2</sub>]<sup>+</sup>, 1), 237 ([M - CH<sub>3</sub> - O<sub>2</sub>N-PhCO<sub>2</sub>H]<sup>+</sup>, 2), 211 ([[(CH<sub>3</sub>)<sub>2</sub>(OH)C-THF(CH<sub>3</sub>)-C(=O)CH<sub>2</sub>CH<sub>2</sub>C]<sup>+</sup>, 2), 194 ([M - C<sub>3</sub>H<sub>7</sub>O - O<sub>2</sub>N-PhCO<sub>2</sub>]<sup>+</sup>, 3), 143 ([[(CH<sub>3</sub>)<sub>2</sub>(OH)C-THF-CH<sub>3</sub>]<sup>+</sup>, 100), 125 ([143 - H<sub>2</sub>O]<sup>+</sup>, 18), 43 ([C<sub>3</sub>H<sub>7</sub>]<sup>+</sup>, 46).

**6 - Fluoro - 1 - [5 - (1 - hydroxy - 1 - methyl-ethyl) - 2 - methyl-tetrahydro-furan-2-yl]-4-methyl-hex-4-en-1-ol (8)**

IR (KBr):  $\nu_{max}$  3392, 2976, 2935, 2873, 1451, 1411, 1377, 1184, 1079, 925; NMR:  $\delta_H$  1.08 (3 H, s, Me), 1.12 (3 H, d,  $J$  7.7, Me), 1.20 (3 H, d,  $J$  2.1, Me), 1.38 (3 H, dd,  $J$  21.6 and 5.8, C(CH<sub>3</sub>)=CHCH<sub>2</sub>F), 1.41 (2 H, m, C(3)-H<sub>2</sub>), 1.65 (2 H, m, C(4)-H<sub>2</sub>), 1.86 (3 H, m, C(2)-CH(OH)CH<sub>2</sub>CH<sup>a</sup>), 2.00 (1 H, m, C(2)-CH(OH)CH<sub>2</sub>CH<sup>b</sup>), 3.34 (1 H, m, C(2)-CH(OH)CH<sub>2</sub>), 3.82 (1 H, m, C(5)-H), 5.07 (ddt,  $J$  11.0 and 7.8 and 1.0, CH<sub>2</sub>C(CH<sub>3</sub>)C=CHCH<sub>2</sub>F), 5.22 (1 H, m, CH<sub>2</sub>C(CH<sub>3</sub>)C=CHCH<sub>2</sub>F), 5.84 (1 H, m, CH<sub>2</sub>C(CH<sub>3</sub>)C=CHCH<sub>2</sub>F);  $\delta_C$  21.0 (C(4)), 24.9 (Me), 25.1 (C(2)-CH(OH)CH<sub>2</sub>), 26.0 (Me), 26.4 (Me), 27.4 (Me), 35.2 (C(3)), 37.2 (C(2)-CH(OH)CH<sub>2</sub>CH<sub>2</sub>), 71.7 (C(5)-C(OH)(CH<sub>3</sub>)<sub>2</sub>), 77.6 (C(2)-CH(OH)CH<sub>2</sub>), 85.3 (C(2) and C(5)), 85.9 (CH<sub>2</sub>F), 113.3 (C(CH<sub>3</sub>)=CHCH<sub>2</sub>F), 140.8 (C(CH<sub>3</sub>)=CHCH<sub>2</sub>F); MS (pos. FAB)  $m/z$  297 ([M + Na]<sup>+</sup>, 100 %), 255 ([M - F]<sup>+</sup>, 21), 237 ([M - F - H<sub>2</sub>O]<sup>+</sup>, 52), 143 ([C(CH<sub>3</sub>)<sub>2</sub>(OH)C-THF-CH<sub>3</sub>]<sup>+</sup>, 60), 71 ([THF + H]<sup>+</sup>, 83), 43 ([C<sub>3</sub>H<sub>7</sub>]<sup>+</sup>, 60).

**Benzoic acid 1-{hydroxy-[5-(1-hydroxy-propyl)-tetrahydro-furan-2-yl]-methyl}-but-3-enyl ester (21)**

NMR data for the first diastereoisomer of compound 21:

NMR:  $\delta_H$  0.93 (3 H, t,  $J$  7.6, C(5)-CH(OH)CH<sub>2</sub>CH<sub>3</sub>), 1.37 (2 H, m, C(5)-CH(OH)CH<sub>2</sub>CH<sub>3</sub>), 1.73 (1 H, m, C(4)-H<sup>a</sup>), 1.98 (3 H, m, C(3)-H<sub>2</sub>), 2.56 (1 H, m, CH<sub>2</sub>=CHCH<sup>a</sup>), 2.70 (1 H, m, CH<sub>2</sub>=CHCH<sup>b</sup>), 3.65 (1 H, dd,  $J$  7.0 and 2.5, C(2)-CH(OH)), 3.81 (1 H, ddd,  $J$  8.1 and 5.4 and 2.9, C(5)-CH(OH)CH<sub>2</sub>CH<sub>3</sub>), 3.92 (1 H, dt,  $J$  7.0 and 2.8, C(5)-H), 4.10 (1 H, dt,  $J$  6.9 and 2.5, C(2)-H), 5.02 (1 H, m, H<sub>2</sub>C=CHCH<sub>2</sub>), 5.09 (1 H, ddd,  $J$  17.1 and 3.0 and 1.4, H<sub>2</sub>C=CHCH<sub>2</sub>), 5.19 (1 H, ddd,  $J$  7.4 and 7.4 and 3.7, C(2)-CH(OH)CH(OBz)CH<sub>2</sub>), 5.83 (1 H, m, H<sub>2</sub>C=CHCH<sub>2</sub>), 7.41 (2 H, m, Ar), 7.53 (1 H, m, Ar), 8.02 (2 H, m, Ar);  $\delta_C$  10.3 (C(5)-CH(OH)CH<sub>2</sub>CH<sub>3</sub>), 24.1 (C(5)-CH(OH)CH<sub>2</sub>CH<sub>3</sub>), 26.3 (C(4)), 28.9 (C(3)), 35.0 (H<sub>2</sub>C=CHCH<sub>2</sub>), 74.1 (C(2)-CH(OH)), 74.5 (C(2)-CH(OH)CH(OBz)CH<sub>2</sub>), 74.8 (C(5)-CH(OH)CH<sub>2</sub>CH<sub>3</sub>), 77.9 (C(2)), 82.5 (C(5)), 118.0 (H<sub>2</sub>C=CH-CH<sub>2</sub>), 128.3 (2 x Ar), 129.8 (2 x Ar), 133.0 (Ar), 133.7 (Ar), 166.0 (CHOC(=O)Ph); IR and MS data are the same as for compound 20.

NMR data for the second diastereoisomer of compound 21:

$\delta_H$  0.91 (3 H, t,  $J$  7.4, C(5)-CH(OH)CH<sub>2</sub>CH<sub>3</sub>), 1.33 (2 H, m, C(5)-CH(OH)CH<sub>2</sub>CH<sub>3</sub>), 1.72 (1 H, m, C(4)-H<sub>2</sub>), 1.94 (3 H, m, C(3)-H<sub>2</sub>), 2.56 (2 H, m, CH<sub>2</sub>=CHCH<sub>2</sub>), 3.59 (1 H, dd,  $J$  5.0 and 3.7, C(2)-CH(OH)), 3.68 (1 H, m, C(5)-CH(OH)CH<sub>2</sub>CH<sub>3</sub>), 3.87 (1 H, dt,  $J$  6.9 and 3.0, C(5)-H), 4.08 (1 H, m, C(2)-H), 5.04 (1 H, m, H<sub>2</sub>C=CHCH<sub>2</sub>), 5.12 (1 H, ddd,  $J$  17.2 and 3.0 and 1.4, H<sub>2</sub>C=CHCH<sub>2</sub>), 5.32 (1 H, ddd,  $J$  7.7 and 5.1 and 5.1, C(2)-CH(OH)CH(OBz)CH<sub>2</sub>), 5.81 (1 H, m, H<sub>2</sub>C=CHCH<sub>2</sub>), 7.40 (2 H, m, Ar), 7.52 (1 H, m, Ar), 8.02 (2 H, m, Ar);  $\delta_C$  10.3 (C(5)-CH(OH)CH<sub>2</sub>CH<sub>3</sub>), 24.0 (C(5)-CH(OH)CH<sub>2</sub>CH<sub>3</sub>), 26.0 (C(4)), 28.8 (C(3)), 35.4 (H<sub>2</sub>C=CHCH<sub>2</sub>), 73.8 (C(2)-CH(OH)), 74.7 (C(2)-CH(OH)CH(OBz)CH<sub>2</sub>), 77.3 (C(5)-CH(OH)CH<sub>2</sub>CH<sub>3</sub>), 78.9 (C(2)), 82.8 (C(5)), 118.2 (H<sub>2</sub>C=CH-CH<sub>2</sub>), 128.3 (2 x Ar), 129.7 (2 x Ar), 133.0 (Ar), 133.4 (Ar), 166.5 (CHOC(=O)Ph); IR and MS data are the same as for compound 20.

**Benzoensäure - 2,3,6 - trihydroxy-6-[5-(1-hydroxy-1-methyl-ethyl) - 2 - methyl - tetrahydrofuran - 2 - yl] - 3 - methyl-hexylester (23b)**

IR (KBr):  $\nu_{max}$  3422, 2970, 2929, 2874, 1717, 1602, 1585, 1452, 1383, 1316, 1275, 1178, 1121, 1071, 1027, 951, 919, 892, 805, 784, 714; NMR:  $\delta_H$  1.10/1.11 (3 H, 2 x s, Me), 1.16/1.17 (3 H, 2 x s, Me), 1.21/1.22 (3 H, 2 x s, C(2)-CH<sub>3</sub>), 1.24/1.25 (3 H, 2 x s, C(CH<sub>3</sub>)(OH)CH(OH)), 1.63-1.89 (8 H, m, C(3)-H<sub>2</sub> and C(4)-H<sub>2</sub> and C(2)-CH(OH)CH<sub>2</sub>CH<sub>2</sub>), 3.40 (1 H, t,  $J$  6.7, C(2)-CH(OH)CH<sub>2</sub>), 3.84 (2 H, m, C(5)-H and CH(OH)CH<sub>2</sub>OBz), 4.27/4.30 (1 H, 2 x dd,  $J$  11.7 and 1.9, PhC(=O)OCH<sup>a</sup>), 4.54/4.58 (1 H, 2 x dd,  $J$  11.7 and 2.8), 7.43 (2 H, m, Ar), 7.56 (1 H, m, Ar), 8.06 (2 H, m, Ar);  $\delta_C$  21.4/21.5 (C(4)), 22.0 (C(2)-CH<sub>3</sub>), 25.0 (C(2)-CH(OH)CH<sub>2</sub>), 25.6/25.8 (C(CH<sub>3</sub>)(OH)CH<sub>2</sub>(OH)), 26.7 (Me), 27.5 (Me), 35.3/35.4 (C(3)), 36.0 (C(2)-CH(OH)CH<sub>2</sub>CH<sub>2</sub>), 66.1/66.4 (CH<sub>2</sub>OBz), 71.7 (C(5)-C(CH<sub>3</sub>)<sub>2</sub>(OH)), 73.1/73.4 (C(CH<sub>3</sub>)(OH)CH(OH)), 74.1/74.4 (C(2)-CH(OH)CH<sub>2</sub>), 75.7 (C(2)), 78.0/78.2 (CH(OH)CH<sub>2</sub>OBz), 85.4/85.7 (C(5)), 128.4 (2 x Ar), 129.7 (3 x Ar), 133.2 (Ar), 167.0 (PhC(=O)OCH<sub>2</sub>); MS (EI)  $m/z$  410 ([M]<sup>+</sup>, 1 %), 403 (2), 374 ([M - 2 H<sub>2</sub>O]<sup>+</sup>, 1), 353 (1), 333 ([M - (CH<sub>3</sub>)<sub>2</sub>C(OH) - H<sub>2</sub>O]<sup>+</sup>, 1), 249 ([M - (CH<sub>3</sub>)<sub>2</sub>(OH)C-THF-CH<sub>3</sub> - H<sub>2</sub>O]<sup>+</sup>, 18), 227 ([M - PhCO - (CH<sub>3</sub>)<sub>2</sub>CHOH - H<sub>2</sub>O]<sup>+</sup>, 23), 209 ([227 - H<sub>2</sub>O]<sup>+</sup>, 11), 143 ([C(CH<sub>3</sub>)<sub>2</sub>(OH)C-THF-CH<sub>3</sub>]<sup>+</sup>, 54), 125 ([143 - H<sub>2</sub>O]<sup>+</sup>, 26), 105 ([PhCO]<sup>+</sup>, 100), 71 ([THF - H]<sup>+</sup>, 53), 59 ([C(CH<sub>3</sub>)<sub>2</sub>C(OH)]<sup>+</sup>, 26), 43 ([C<sub>3</sub>H<sub>7</sub>]<sup>+</sup>, 55); HRMS (EI)  $m/z$  374.2085 ([M - 2 H<sub>2</sub>O]<sup>+</sup>, C<sub>22</sub>H<sub>30</sub>O<sub>5</sub> requires 374.2093).

**6 - (tert-Butyl - diphenyl - silanyloxy) - 1 - [5 - (1 - hydroxy-1-methyl-ethyl)-2-methyl-tetrahydrofuran-2-yl]-4-methyl-hexan-1,4,5-triol (23a)**

IR (KBr):  $\nu_{max}$  3499, 3072, 3049, 2967, 2933, 2889, 2858, 1769, 1718, 1472, 1463, 1428, 1382, 1363, 1236, 1145, 1113, 1064, 1029, 947, 918, 824, 740, 704, 614, 505; NMR:  $\delta_H$  1.08 (9 H, s, SiC(CH<sub>3</sub>)<sub>3</sub>), 1.11 (3 H, s, C(2)-CH<sub>3</sub>), 1.16 (6 H, 2 x s, 2 x Me), 1.32 (3 H, s, C(CH<sub>3</sub>)(OH)CH(OH)), 1.85 (8 H, m, C(3)-H<sub>2</sub> and C(4)-H<sub>2</sub> and C(2)-CH(OH)CH<sub>2</sub>CH<sub>2</sub>), 1.90 (4 H, br s, 4 x OH), 3.75 (3 H, m, C(5)-H and C(2)-CH(OH) and CH(OH)CH<sub>2</sub>OTBDPS), 4.88 (2 H, dd,  $J$  11.0 and 1.7, CH<sub>2</sub>OTBDPS), 7.39 (6 H, m, Ar), 7.67 (4 H, m, Ar);  $\delta_C$  19.2 (SiC(CH<sub>3</sub>)<sub>3</sub>), 21.9 (C(4)), 24.1 (Me), 24.7 (Me), 26.1 (C(2)-CH<sub>3</sub>), 26.6 (SiC(CH<sub>3</sub>)<sub>3</sub>), 29.9 (C(2)-CH(OH)CH<sub>2</sub>), 34.4 (C(2)-CH(OH)CH<sub>2</sub>), 35.3 (C(3)), 39.8 (C(2)-CH(OH)CH<sub>2</sub>CH<sub>2</sub>), 62.3 (CH<sub>2</sub>OTBDPS), 70.4 (C(5)-C(OH)(CH<sub>3</sub>)<sub>2</sub>), 77.0 (C(2)-C(OH)CH<sub>2</sub>), 78.8 (C(CH<sub>3</sub>)(OH)-CH(OH)), 83.4 (C(2)), 84.3 (CH(OH)CH<sub>2</sub>OTBDPS), 85.8 (C(5)), 127.7 (4 x Ar), 129.8 (2 x Ar), 135.6

(4 x Ar); MS (EI)  $m/z$  467 ([M - Ph]<sup>+</sup>, 1 %), 449 ([M - Ph - H<sub>2</sub>O]<sup>+</sup>, 1), 407 (1), 425 (1), 347 (4), 281 ([C=CH-OTBDPS]<sup>+</sup>, 6), 227 ([M - H<sub>2</sub>O - C(OH)CH<sub>2</sub>OTBDPS]<sup>+</sup>, 38), 209 ([227 - H<sub>2</sub>O]<sup>+</sup>, 39), 199 ([Ph<sub>2</sub>SiOH]<sup>+</sup>, 100), 183 [Ph<sub>2</sub>SiH]<sup>+</sup>, 26), 143 [(CH<sub>3</sub>)<sub>2</sub>(OH)C-THF-CH<sub>3</sub>]<sup>+</sup>, 18), 135 (36), 125 ([143 - H<sub>2</sub>O]<sup>+</sup>, 21), 71 ([THF - H]<sup>+</sup>, 90).

**1 - [5 - (1 - Hydroxy-1-methyl-ethyl)-2 -methyl-tetrahydro-furan-2-yl]-4,8-dimethyl-trideca-4,8-diene-1,10-dione (29)**

IR (KBr):  $\nu_{max}$  3448, 2975, 1714, 1647, 1448, 1379, 1223, 1146, 1042, 865; NMR:  $\delta_H$  1.05 (3 H, s, Me), 1.22 (3 H, t,  $J$  7.2, C(=O)OCH<sub>2</sub>CH<sub>3</sub>), 1.25 (3 H, s, Me), 1.36 (3 H, s, Me), 1.55/1.61 (3 H, 2 x s, Me), 1.74 (3 H, m, C(3)-H<sup>a</sup> and C(4)-H<sub>2</sub>), 2.09 (3H, s, Me), 2.10 (4 H, m, C(CH<sub>3</sub>)=CHCH<sub>2</sub>CH<sub>2</sub>C(CH<sub>3</sub>)=CH), 2.20 (3 H, m, C(3)-H<sup>b</sup> and C(2)-C(=O)CH<sub>2</sub>CH<sub>2</sub>), 2.56 (2 H, m, C(2)-C(=O)CH<sub>2</sub>), 3.18/3.24 (1 H, 2 x br s, OH), 3.86 (1 H, m, C(5)-H), 4.08 (2 H, q,  $J$  7.2, C(=O)OCH<sub>2</sub>CH<sub>3</sub>), 5.04 (1 H, m, C(2)-C(=O)(CH<sub>2</sub>)<sub>2</sub>C(CH<sub>3</sub>)=CH), 5.59 (1 H, 2 x s, C(CH<sub>3</sub>)=CHCO<sub>2</sub>Et);  $\delta_C$  14.2 (C(=O)OCH<sub>2</sub>CH<sub>3</sub>), 16.1 (Me), 18.7 (Me), 23.1/23.8 (Me), 24.7 (Me), 25.6/25.7 (C(CH<sub>3</sub>)=CHCH<sub>2</sub>CH<sub>2</sub>C(CH<sub>3</sub>)=CH), 25.8 (C(4)), 27.8 (Me), 33.2 (C(2)-C(=O)CH<sub>2</sub>), 35.5/35.8 (C(2)-C(=O)CH<sub>2</sub>CH<sub>2</sub>), 36.0/36.1 (C(3)), 40.6/40.9 (C(CH<sub>3</sub>)=CH-CH<sub>2</sub>CH<sub>2</sub>C(CH<sub>3</sub>)=CH), 59.5 (C(=O)OCH<sub>2</sub>CH<sub>3</sub>), 70.7 (C(5)-C(OH)(CH<sub>3</sub>)<sub>2</sub>), 86.9 (C(5)), 88.3 (C(2)), 115.8 (C(CH<sub>3</sub>)=CHCO<sub>2</sub>Et), 123.5/124.7 (C(2)-C(=O)(CH<sub>2</sub>)<sub>2</sub>C(CH<sub>3</sub>)=CH), 134.6/134.8 (C(2)-C(=O)(CH<sub>2</sub>)<sub>2</sub>C(CH<sub>3</sub>)=CH), 159.6 (C(CH<sub>3</sub>)=CHCO<sub>2</sub>Et), 166.9 (C(=O)OEt), 213.2 (C(2)-C(=O)CH<sub>2</sub>); MS (EI)  $m/z$  380 ([M]<sup>+</sup>, 1 %), 335 ([M - OEt]<sup>+</sup>, 1), 322 ([M - (CH<sub>3</sub>)<sub>2</sub>(OH)C + H]<sup>+</sup>, 1), 309 (2), 285 (3), 225 ([[(CH<sub>3</sub>)<sub>2</sub>(OH)-THF(CH<sub>3</sub>)-C(=O)(CH<sub>2</sub>)<sub>2</sub>]<sup>+</sup>, 14), 143 ([[(CH<sub>3</sub>)<sub>2</sub>(OH)C-THF-CH<sub>3</sub>]<sup>+</sup>, 100), 125 ([143 - H<sub>2</sub>O]<sup>+</sup>, 28); HRMS (EI)  $m/z$  380.2573 ([M]<sup>+</sup>, C<sub>22</sub>H<sub>36</sub>O<sub>5</sub> requires 380.2563).

**Acetic acid 6-[5-(6-acetoxy-1-hydroxy-hex-4-enyl)-tetrahydro-furan-2-yl]-6-hydroxy-hex-2-enyl ester (32)**

IR (KBr):  $\nu_{max}$  3442, 2941, 1740, 1446, 1383, 1365, 1236, 1073, 1026, 969; NMR:  $\delta_H$  1.51 (4 H, m, C(2)-CH(OH)CH<sub>2</sub>), 1.71 (2 H, m, C(3)-H<sup>a</sup>), 1.88 (2 H, m, C(3)-H<sup>b</sup>), 2.00 (6 H, s, CH<sub>3</sub>C(=O)O), 2.11 (2 H, m, C(2)-CH(OH)CH<sub>2</sub>CH<sub>2</sub>), 2.23 (2 H, m, C(2)-CH(OH)CH<sub>2</sub>CH<sub>2</sub>), 3.37 (2 H, ddd,  $J$  8.9 and 5.2 and 3.9, C(2)-CH(OH)CH<sub>2</sub>), 3.76 (2 H, m, C(2)-H), 4.45 (4 H, dd,  $J$  6.5 and 0.8, CH<sub>3</sub>C(=O)OCH<sub>2</sub>), 5.54 (2 H, dt,  $J$  15.4 and 6.5 and 1.4, CH<sub>3</sub>C(=O)CH<sub>2</sub>CH=CH), 5.72 (2 H, m, CH<sub>3</sub>C(=O)CH<sub>2</sub>CH=CH);  $\delta_C$  20.9 CH<sub>3</sub>C(=O)O), 27.9 (C(3)), 28.3 (C(2)-CH(OH)CH<sub>2</sub>CH<sub>2</sub>), 33.1 (C(2)-CH(OH)CH<sub>2</sub>), 65.1 (CH<sub>3</sub>C(=O)OCH<sub>2</sub>), 73.4 (C(2)-CH(OH)CH<sub>2</sub>), 85.5 (C(2)), 124.2 (CH<sub>3</sub>C(=O)CH<sub>2</sub>CH=CH), 135.7 (CH<sub>3</sub>C(=O)OCH<sub>2</sub>-CH=CH), 170.8 (CH<sub>3</sub>C(=O)OCH<sub>2</sub>); MS (EI)  $m/z$  384 ([M]<sup>+</sup>, 1 %), 366 ([M - H<sub>2</sub>O]<sup>+</sup>, 1), 324 ([M - CH<sub>3</sub>COOH]<sup>+</sup>, 1), 197 (4), 167 (12), 43 ([CH<sub>3</sub>CO]<sup>+</sup>, 100); HRMS (EI)  $m/z$  384.2151 ([M]<sup>+</sup>, C<sub>20</sub>H<sub>32</sub>O<sub>7</sub> requires 384.2148).

**Acetic acid 6-[5-(6-acetoxy-hex-4-enyl)-tetrahydro-furan-2-yl]-6-hydroxy-hex-2-enyl ester (ketol corresponding to compound 32)**

IR (KBr):  $\nu_{max}$  3448, 2948, 1771, 1737, 1383, 1368, 1242, 1193, 1052, 1030, 977; NMR:  $\delta_H$  1.49 (1 H, m, C(5)-CH(OH)CH<sup>a</sup>), 1.61 (1 H, m, C(5)-CH(OH)CH<sup>b</sup>), 1.73 (1 H, m, C(4)-H<sup>a</sup>), 1.89 (2 H, m, C(4)-H<sup>b</sup> and C(3)-H<sup>a</sup>), 2.00 (6 H, s, CH<sub>3</sub>C(=O)OCH<sub>2</sub>), 2.11 (1 H, m, C(3)-H<sup>b</sup>), 2.20 (1 H, m, C(5)-CH(OH)CH<sub>2</sub>CH<sup>a</sup>), 2.28 (3 H, m, C(5)-CH(OH)CH<sub>2</sub>CH<sup>b</sup> and C(2)-C(=O)CH<sub>2</sub>CH<sub>2</sub>), 2.50 (2 H, m, C(2)-C(=O)CH<sub>2</sub>), 3.37 (1 H, m, C(5)-CH(OH)CH<sub>2</sub>), 3.66 (1 H, br s, OH), 3.91 (1 H, m, C(5)-H), 4.12 (1 H, m, C(2)-H), 4.43 (m, 4 H, CH<sub>3</sub>C(=O)OCH<sub>2</sub>), 5.54 (2 H, m, CH<sub>3</sub>C(=O)OCH<sub>2</sub>CH=CH), 5.70 (2 H, m, CH<sub>3</sub>C(=O)OCH<sub>2</sub>CH=CH);  $\delta_C$  20.9 (2 x CH<sub>3</sub>C(=O)O), 25.7 (C(2)-C(=O)CH<sub>2</sub>CH<sub>2</sub>), 26.7 (C(4)), 28.4 (C(5)-CH(OH)CH<sub>2</sub>CH<sub>2</sub>), 29.2 (C(3)), 33.8 (C(5)-CH(OH)CH<sub>2</sub>), 37.7 (C(2)-C(=O)CH<sub>2</sub>), 64.7 (C(=O)OCH<sub>2</sub>CH<sub>3</sub>), 65.1 (C(=O)OCH<sub>2</sub>CH<sub>3</sub>), 72.0 (C(5)-CH(OH)CH<sub>2</sub>), 82.6 (C(5)), 83.9 (C(2)), 124.1 (CH(OH)(CH<sub>2</sub>)<sub>2</sub>CH=CH), 125.1 (C(=O)(CH<sub>2</sub>)<sub>2</sub>CH=CH), 133.8 (C(=O)(CH<sub>2</sub>)<sub>2</sub>CH=CH), 135.8 (CH(OH)-(CH<sub>2</sub>)<sub>2</sub>CH=CH), 170.7 (CH<sub>3</sub>C(=O)OCH<sub>2</sub>), 170.8 (CH<sub>3</sub>C(=O)OCH<sub>2</sub>), 211.0 (C(2)-C(=O)CH<sub>2</sub>); MS (EI)  $m/z$  382 ([M]<sup>+</sup>, 1 %), 294 (5), 241 (27), 183 ([CH<sub>2</sub>CH(OH)-THF-C(=O)(CH<sub>2</sub>)<sub>2</sub>CH]<sup>+</sup>, 19), 167 ([[(CH<sub>2</sub>)<sub>2</sub>CH-THF-C(=O)CH<sub>2</sub>]<sup>+</sup>, 46), 85 (54), 43 ([CH<sub>3</sub>CO]<sup>+</sup>, 100).
